# Supplementary material for: A hierarchical expert-guided machine learning framework for clinical decision support systems: an application to traumatic brain injury prognostication
Source: PubMed Central journal article supplement (PMC8105342; doi:10.1038/s41746-021-00445-0), 2021-05-07
Supplement: 41746_2021_445_MOESM1_ESM.pdf [file 41746_2021_445_MOESM1_ESM.pdf]

# **Supplementary Information: A Hierarchical Expert-Guided Machine Learning Framework for Clinical Decision Support Systems: An Application to Traumatic Brain Injury Prognostication**

## **Supplementary Methods**

### **Machine Learning Algorithm Selection**

To select the machine learning algorithm to be used in this study, we trained five different algorithms including XGBoost, deep learning, logistic regression, and support vector machine using the initial 62 candidate features. For deep learning, we used feed forward neural network with 4 hidden layers. The model that performed the best on the validation set is then chosen for the remainder of the process. Supplementary Table 2 compares the performance of the candidate machine learning algorithms. Although the performance on the validation is used to select the model, for more information, we included the performance on the training and test sets in Supplementary Table 2 as well. XGBoost model outperformed the other methods and was chosen in our TBI prognostication study.

### **Hyperparameter Tuning**

The hyperparameters were optimized for all models using grid search over a specified subset of the hyperparameter space. For each model, the combination of the hyperparameters that yielded the maximum F1 score was selected. This combination was calculated based on the validation set performance.

## **Supplementary Results**

Supplementary Table 4 compares the predictive performance of multiple classifiers, including XGBoost, deep learning, logistic regression, and support vector machine, using the 18 selected variables after excluding non-robust and counterintuitive variables. It can be concluded that after feature selection, the predictive performance of logistic regression outperforms the XGBoost model. However, the logistic regression model's log-odds coefficient for the variable INR is negative (log-odds = -0.04), contrary to domain knowledge. A higher INR value leads to a greater risk of bleeding, and thus, a worse outcome, while the logistic regression coefficient contradicts it. This result might suggest that it is preferable for each classifier to use a feature selection method based on its underlying mathematical assumptions.

## Supplementary Tables

**Supplementary Table 1.** List of candidate and selected variables and their definitions. <sup>a</sup> Subarachnoid hemorrhage refers to bleeding into the subarachnoid space between the brain and the surrounding membrane. Brain regions include suprasellar, basal cisterns, right and left Sylvian fissure, right and left interhemispheric, right and left lobar-frontal, right and left lobar-parietal, right and left lobar-occipital, right and left lobar temporal. <sup>b</sup> Intraparenchymal hemorrhage refers to bleeding within the brain parenchyma. Brain regions include midbrain/pons, right and left frontal, right and left temporal, right and left parietal, right and left occipital, right and left basal ganglia, right and left posterior fossa. <sup>c</sup> Brain contusions refer to the bruises of the brain tissue. Brain regions include midbrain/pons, right and left frontal, right and left temporal, right and left parietal, right and left occipital, right and left basal ganglia, right and left posterior fossa. <sup>d</sup> Diffuse Axonal Injury (DAI) corresponds to shearing of the brain's axons due to brain shifts or rotations after an injury. Brain regions include right and left frontal, right and left parietal, right and left basal ganglia, brainstem, corpus callosum, right and left centrum semiovale. <sup>e</sup> Brain regions include midbrain/pons, right and left frontal, right and left temporal, right and left parietal, right and left occipital, right and left basal ganglia.

| Name                                  | Definition (unit)                                                                   | Median (min-max) | No: Yes or None: One: Two                  | Selected in Final Model |
|---------------------------------------|-------------------------------------------------------------------------------------|------------------|--------------------------------------------|-------------------------|
| Demographics                          |                                                                                     |                  |                                            |                         |
| Age                                   |                                                                                     | 35 (17-94)       |                                            | Yes                     |
| Sex: female                           |                                                                                     |                  | 607 (73.04%):<br>224 (26.96%)              |                         |
| Baseline features                     |                                                                                     |                  |                                            |                         |
| Best motor response                   | As defined by <sup>1</sup>                                                          | 4 (1-6)          |                                            | Yes                     |
| Best eye opening response             | As defined by <sup>1</sup>                                                          | 1 (1-4)          |                                            | Yes                     |
| Best verbal response                  | As defined by <sup>1</sup>                                                          | 1 (1-5)          |                                            | Yes                     |
| Pupil response                        | None, one, or both eyes                                                             |                  | 35 (4.2%):<br>125 (15.0%):<br>671 (80.7%)  |                         |
| Radiology report                      |                                                                                     |                  |                                            |                         |
| Epidural hematoma (#)                 | Zero if none, one if unilateral, and two if bilateral epidural hematoma             |                  | 710 (85.44%):<br>110(13.24%):<br>11(1.32%) |                         |
| Epidural hematoma (max width)         | (mm)                                                                                | 0 (0-102)        |                                            |                         |
| Subdural hematoma (#)                 | Zero if none, one if unilateral, and two if bilateral subdural hematoma             |                  | 425 (51.1%):<br>330 (39.7%):<br>76 (9.1%)  | Yes                     |
| Subdural hematoma (max width)         | (mm)                                                                                | 0 (0-125)        |                                            | Yes                     |
| Subarachnoid hemorrhage (#)           | Number of brain regions with subarachnoid hemorrhage <sup>a</sup>                   | 1 (0-14)         |                                            | Yes                     |
| Intra-ventricular hemorrhage          | Zero if none, one if minimal layering, and two if clot intra-ventricular hemorrhage |                  | 642 (77.3%):<br>119 (14.3%):<br>70 (8.4%)  | Yes                     |
| Intraparenchymal hematoma (#)         | Number of brain regions with intraparenchymal hemorrhage <sup>b</sup>               | 0 (0-4)          |                                            |                         |
| Intraparenchymal hematoma (max width) | (mm)                                                                                | 0 (0-67)         |                                            | Yes                     |
| Evidence of surgical evacuation       | Evidence of surgical evacuation of intraparenchymal hematoma                        |                  | 827 (99.52%):<br>4 (%0.48)                 |                         |

Supplementary Table 1 continued from previous page

| Name                          | Definition (unit)                                                         | Median (min–max) | No: Yes or None: One: Two                    | Selected in Final Model |
|-------------------------------|---------------------------------------------------------------------------|------------------|----------------------------------------------|-------------------------|
| Brain contusion (#)           | Number of brain regions with brain contusion <sup>c</sup>                 | 0 (0-5)          |                                              | Yes                     |
| Brain contusion (max width)   | (mm)                                                                      | 0 (0-93)         |                                              | Yes                     |
| DAI finding (#)               | Number of brain regions with diffuse axonal injury <sup>d</sup>           | 0 (0-6)          |                                              | Yes                     |
| DAI finding (max width)       | Maximum width of diffuse axonal injury (mm)                               | 0 (0–22)         |                                              |                         |
| Generalized edema severity    | Zero if none, one of mild, and two if moderate edema                      |                  | 654 (78.70%):<br>52 (6.26%):<br>125 (15.04%) |                         |
| Focal swelling (#)            | Number of brain regions with focal swelling <sup>e</sup>                  | 0 (0-3)          |                                              |                         |
| Midline shift                 | Shift of over 5 mm                                                        |                  | 705 (84.84%):<br>126 (15.16%)                |                         |
| Sulcal obliteration           | Zero if none, one if unilateral, and two if bilateral sulcal obliteration |                  | 643 (77.38%):<br>77 (9.27%):<br>111 (13.36%) |                         |
| Lateral ventricle compression |                                                                           |                  | 835 (76.41%):<br>159 (19.13%)                |                         |
| Third ventricle compression   |                                                                           |                  | 653 (78.6%):<br>178 (21.4%)                  | Yes                     |
| Transtentorial herniation     |                                                                           |                  | 700 (84.2%):<br>131 (15.8%)                  | Yes                     |
| Uncal herniation              |                                                                           |                  | 714 (85.92%):<br>117 (14.08%)                |                         |
| Tonsillar herniation          |                                                                           |                  | 767 (92.30%):<br>64 (7.70%)                  |                         |
| Upward herniation             |                                                                           |                  | 819 (98.56%):<br>12 (1.44%)                  |                         |
| Depressed skull fracture      |                                                                           |                  | 773 (93.02%):<br>58 (6.98%)                  |                         |
| Basilar skull fracture        |                                                                           |                  | 646 (77.74%):<br>185 (22.26%)                |                         |
| Abbreviated Injury Scores     |                                                                           |                  |                                              |                         |
| Neck                          |                                                                           | 4 (0-6)          |                                              |                         |
| Face                          |                                                                           | 0 (0–4)          |                                              |                         |
| Chest                         |                                                                           | 1 (0-5)          |                                              |                         |
| Abdomen                       |                                                                           | 0 (0–5)          |                                              |                         |
| Extremity                     |                                                                           | 1 (0–5)          |                                              |                         |
| External skin                 |                                                                           | 1 (0–4)          |                                              |                         |
| Laboratory values             |                                                                           |                  |                                              |                         |
| Glucose                       | (mg/dL)                                                                   | 143 (68-554)     |                                              | Yes                     |

**Supplementary Table 1 continued from previous page**

| <b>Name</b>                       | <b>Definition (unit)</b>                                                                                                                             | <b>Median (min–max)</b> | <b>No: Yes or None: One: Two</b> | <b>Selected in Final Model</b> |
|-----------------------------------|------------------------------------------------------------------------------------------------------------------------------------------------------|-------------------------|----------------------------------|--------------------------------|
| Creatinine                        | (mg/dL)                                                                                                                                              | 1.0<br>(0.3-4.2)        |                                  |                                |
| Potassium                         | (mmol/L)                                                                                                                                             | 3.7<br>(1.5-6.5)        |                                  |                                |
| Sodium                            | (mmol/L)                                                                                                                                             | 140<br>(125-157)        |                                  |                                |
| Chloride                          | (mmol/L)                                                                                                                                             | 105<br>(88-130)         |                                  |                                |
| Bicarbonate                       | (mmol/L)                                                                                                                                             | 23<br>(8-34)            |                                  |                                |
| Hgb                               | Hemoglobin (g/dL)                                                                                                                                    | 13.8<br>(2.0-18.7)      |                                  | Yes                            |
| WBC                               | White blood cell count ( $\times 10^9/L$ )                                                                                                           | 13.6<br>(3.2-41.4)      |                                  |                                |
| Platelets                         | Platelet count ( $\times 10^3/mm^3$ )                                                                                                                | 237<br>(36-700)         |                                  |                                |
| aPTT                              | Activated partial thromboplastin time (sec)                                                                                                          | 26<br>(12-73)           |                                  | Yes                            |
| INR                               | International Normalized Ratio                                                                                                                       | 1.1<br>(0.8-12.0)       |                                  | Yes                            |
| <b>Medical history</b>            |                                                                                                                                                      |                         |                                  |                                |
| Active neurological disease       | Includes prior TBI hospitalization or medical evaluation, CVA, seizure, paralysis/neurological weakness, headache, sleep disorder, and other unknown |                         | 804 (96.75%):<br>27 (3.25%)      |                                |
| Inactive neurological disease     | Prior neurological disease                                                                                                                           |                         | 735 (88.45%):<br>96 (11.55%)     |                                |
| Active cardiovascular disease     | Includes heart disease, hypertension, arrhythmias, and other unknown                                                                                 |                         | 692 (83.3%):<br>139 (16.7%)      |                                |
| Inactive cardiovascular disease   | Prior cardiovascular disease                                                                                                                         |                         | 787 (94.71%):<br>44 (5.29%)      |                                |
| Active pulmonary disease          | Includes COPD or asthma, and other unknown                                                                                                           |                         | 779 (93.73%):<br>52 (6.26%)      |                                |
| Inactive pulmonary disease        | Prior pulmonary disease                                                                                                                              |                         | 793 (95.43%):<br>38 (0.457%)     |                                |
| Active metabolic disease          | Includes diabetes mellitus, pituitary disease, and other unknown                                                                                     |                         | 760 (91.46%):<br>71 (8.54%)      |                                |
| Inactive metabolic disease        | Prior metabolic disease                                                                                                                              |                         | 827 (99.52%):<br>4 (0.48%)       |                                |
| Active gastrointestinal disease   | Includes liver disease, hepatitis, and other unknown                                                                                                 |                         | 768 (92.42%):<br>63 (7.58%)      |                                |
| Inactive gastrointestinal disease | Prior gastrointestinal disease                                                                                                                       |                         | 800 (96.27%):<br>31 (3.73%)      |                                |
| Active psychiatric disease        | Includes depression/ suicidal gestures, schizophrenia, anxiety, and other unknown                                                                    |                         | 699 (84.12%):<br>132 (15.88%)    |                                |

**Supplementary Table 1 continued from previous page**

| <b>Name</b>                  | <b>Definition (unit)</b>              | <b>Median (min-max)</b> | <b>No: Yes or None: One: Two</b> | <b>Selected in Final Model</b> |
|------------------------------|---------------------------------------|-------------------------|----------------------------------|--------------------------------|
| Inactive psychiatric disease | Prior psychiatric disease             |                         | 802 (96.51%):<br>29 (3.49%)      |                                |
| Active substance abuse       | Alcohol and non-prescribed drug abuse |                         | 592 (71.24%):<br>239 (28.76%)    |                                |
| Inactive substance abuse     | Prior substance abuse                 |                         | 782 (94.10%):<br>49 (5.90%)      |                                |

**Supplementary Table 2.** The Kendall's  $\tau$  correlation coefficients and the corresponding  $p$ -values of variables that demonstrated robust or non-robust SHAP global behavior.

| <b>Robust Variables</b>               |               |                             |
|---------------------------------------|---------------|-----------------------------|
| <b>Variable name</b>                  | <b>Median</b> | <b><math>p</math>-value</b> |
| Age                                   | 0.74          | <0.001                      |
| Best motor response                   | -0.75         | <0.001                      |
| Subarachnoid hemorrhage (#)           | 0.79          | <0.001                      |
| Intra-ventricular hemorrhage          | 0.60          | <0.001                      |
| Best eye opening response             | -0.66         | 0.003                       |
| Hgb                                   | -0.76         | 0.003                       |
| Transtentorial herniation             | 0.52          | 0.006                       |
| Best verbal response                  | -0.76         | 0.007                       |
| Third ventricle compression           | 0.59          | 0.012                       |
| Subdural hematoma (max width)         | 0.64          | 0.018                       |
| Brain contusion (max width)           | 0.56          | 0.018                       |
| Subdural hematoma (#)                 | 0.68          | 0.019                       |
| DAI finding (#)                       | 0.45          | 0.025                       |
| Platelets                             | 0.67          | 0.039                       |
| Glucose                               | 0.52          | 0.054                       |
| Intraparenchymal hematoma (max width) | 0.28          | 0.066                       |
| Brain contusion (#)                   | 0.50          | 0.084                       |
| Active gastrointestinal disease       | -0.40         | 0.086                       |
| aPTT                                  | 0.59          | 0.089                       |
| Active substance abuse                | -0.65         | 0.088                       |
| INR                                   | 0.62          | 0.087                       |
| <b>Non-robust Variables</b>           |               |                             |
| <b>Variable name</b>                  | <b>Median</b> | <b><math>p</math>-value</b> |
| Pupil response                        | -0.55         | 0.105                       |
| Active cardiovascular disease         | 0.53          | 0.120                       |
| DAI finding (max width)               | 0.41          | 0.130                       |
| Basilar skull fracture                | 0.61          | 0.162                       |
| Intraparenchymal hematoma (#)         | 0.32          | 0.169                       |
| Abdomen injury severity score         | -0.57         | 0.170                       |
| Creatinine                            | -0.45         | 0.182                       |
| Potassium                             | 0.48          | 0.184                       |
| Chest injury severity score           | 0.59          | 0.188                       |
| Lateral ventricle compression         | 0.55          | 0.210                       |
| Extremity injury severity score       | 0.59          | 0.232                       |
| Bicarbonate                           | 0.28          | 0.248                       |
| Uncal herniation                      | 0.50          | 0.251                       |
| Generalized edema severity            | 0.57          | 0.271                       |
| External skin injury severity score   | -0.41         | 0.293                       |
| Sulcal obliteration                   | 0.57          | 0.302                       |
| WBC                                   | -0.32         | 0.304                       |
| Face injury severity score            | -0.47         | 0.323                       |
| Inactive gastrointestinal disease     | 0.27          | 0.330                       |
| Inactive neurological disease         | -0.47         | 0.358                       |
| Midline shift                         | 0.52          | 0.374                       |
| Neck injury severity score            | 0.26          | 0.382                       |
| Depressed skull fracture              | -0.39         | 0.390                       |
| Chloride                              | 0.17          | >0.400                      |
| Active pulmonary disease              | -0.36         | >0.400                      |
| Gender                                | -0.62         | >0.400                      |

**Supplementary Table 2 continued from previous page**

| <b>Variable name</b>            | <b>Median</b> | <b>p-value</b> |
|---------------------------------|---------------|----------------|
| Sodium                          | -0.06         | >0.400         |
| Focal edema (#)                 | -0.32         | >0.400         |
| Tonsillar herniation            | 0.40          | >0.400         |
| Active psychiatric disease      | -0.50         | >0.400         |
| Epidural hematoma (max width)   | -0.04         | >0.400         |
| Inactive substance abuse        | -0.33         | >0.400         |
| Inactive cardiovascular disease | 0.30          | >0.400         |
| Epidural hematoma (#)           | 0.00          | >0.400         |
| Inactive psychiatric disease    | -0.27         | >0.400         |
| Active metabolic disease        | 0.09          | >0.400         |
| Inactive pulmonary disease      | -0.29         | >0.400         |
| Active neurological disease     | -0.07         | >0.400         |
| Evidence of surgical evacuation | -0.11         | >0.400         |
| Upward herniation               | 0.20          | >0.400         |
| Inactive metabolic disease      | 0.14          | >0.400         |

**Supplementary Table 3.** Comparing the performance of multiple machine learning algorithms in predicting GOSE  $\leq 4$  using initial candidate variables. Standard deviation (SD) is calculated over 5 cross-validation folds.

| <b>Training Set</b>   |                 |                      |                            |                               |
|-----------------------|-----------------|----------------------|----------------------------|-------------------------------|
| <b>Method</b>         | <b>XGBoost</b>  | <b>Deep learning</b> | <b>Logistic regression</b> | <b>Support vector machine</b> |
| AUC (SD)              | 0.9372 (0.0236) | 0.9403 (0.0482)      | 0.8681 (0.0043)            | 0.8193 (0.0135)               |
| Accuracy (SD)         | 0.8522 (0.0327) | 0.8702 (0.0703)      | 0.7868 (0.0136)            | 0.7468 (0.0240)               |
| F1 (SD)               | 0.8281 (0.0360) | 0.8467 (0.0747)      | 0.7527 (0.0106)            | 0.6613 (0.0409)               |
| Sensitivity (SD)      | 0.8477 (0.0305) | 0.8324 (0.0441)      | 0.7749 (0.0187)            | 0.5939 (0.0545)               |
| Specificity (SD)      | 0.8554 (0.0440) | 0.8974 (0.1012)      | 0.7954 (0.0319)            | 0.8568 (0.0116)               |
| Precision (SD)        | 0.8106 (0.0529) | 0.8677 (0.1194)      | 0.7329 (0.0273)            | 0.7479 (0.0226)               |
| <b>Validation Set</b> |                 |                      |                            |                               |
| <b>Method</b>         | <b>XGBoost</b>  | <b>Deep learning</b> | <b>Logistic regression</b> | <b>Support vector machine</b> |
| AUC (SD)              | 0.7822 (0.0126) | 0.7607 (0.0269)      | 0.7652 (0.0304)            | 0.7838 (0.0206)               |
| Accuracy (SD)         | 0.7500 (0.0169) | 0.7051 (0.0398)      | 0.7164 (0.0225)            | 0.7500 (0.0334)               |
| F1 (SD)               | 0.7129 (0.0190) | 0.6540 (0.0364)      | 0.6735 (0.0377)            | 0.6652 (0.0492)               |
| Sensitivity (SD)      | 0.7434 (0.0489) | 0.6669 (0.0762)      | 0.7055 (0.0828)            | 0.5978 (0.0695)               |
| Specificity (SD)      | 0.7549 (0.0456) | 0.7330 (0.0963)      | 0.7248 (0.0542)            | 0.8596 (0.0479)               |
| Precision (SD)        | 0.6880 (0.0330) | 0.6519 (0.0653)      | 0.6505 (0.0303)            | 0.7595 (0.0602)               |
| <b>Test Set</b>       |                 |                      |                            |                               |
| <b>Method</b>         | <b>XGBoost</b>  | <b>Deep learning</b> | <b>Logistic regression</b> | <b>Support vector machine</b> |
| AUC                   | 0.8094          | 0.7790               | 0.8033                     | 0.7695                        |
| Accuracy              | 0.7536          | 0.7290               | 0.7391                     | 0.7005                        |
| F1                    | 0.7052          | 0.6500               | 0.6747                     | 0.5811                        |
| Sensitivity           | 0.7011          | 0.5977               | 0.6437                     | 0.4943                        |
| Specificity           | 0.7917          | 0.8250               | 0.8083                     | 0.8500                        |
| Precision             | 0.7093          | 0.7123               | 0.7089                     | 0.7049                        |



**Supplementary Table 4.** Comparing the performance of multiple machine learning algorithms in predicting GOSE  $\leq 4$  using the 18 selected variables after excluding non-robust and counterintuitive variables. Standard deviation (SD) is calculated over 5 cross-validation folds.

| <b>Training Set</b>   |                 |                      |                            |                               |
|-----------------------|-----------------|----------------------|----------------------------|-------------------------------|
| <b>Method</b>         | <b>XGBoost</b>  | <b>Deep learning</b> | <b>Logistic regression</b> | <b>Support vector machine</b> |
| AUC (SD)              | 0.8912 (0.0252) | 0.9213 (0.0398)      | 0.8681 (0.0043)            | 0.8110 (0.0056)               |
| Accuracy (SD)         | 0.8053 (0.0285) | 0.8393 (0.0581)      | 0.7868 (0.0136)            | 0.7300 (0.0104)               |
| F1 (SD)               | 0.7740 (0.0375) | 0.7999 (0.0724)      | 0.7527 (0.0106)            | 0.6429 (0.0214)               |
| Sensitivity (SD)      | 0.8018 (0.0637) | 0.7681 (0.0801)      | 0.7749 (0.0187)            | 0.5824 (0.0323)               |
| Specificity (SD)      | 0.8078 (0.0238) | 0.8905 (0.0680)      | 0.7954 (0.0319)            | 0.8361 (0.0073)               |
| Precision (SD)        | 0.7500 (0.0252) | 0.8394 (0.0850)      | 0.7329 (0.0273)            | 0.7185 (0.0062)               |
| <b>Validation Set</b> |                 |                      |                            |                               |
| <b>Method</b>         | <b>XGBoost</b>  | <b>Deep learning</b> | <b>Logistic regression</b> | <b>Support vector machine</b> |
| AUC (SD)              | 0.7836 (0.0189) | 0.7731 (0.0334)      | 0.8042 (0.0207)            | 0.7890 (0.0187)               |
| Accuracy (SD)         | 0.7451 (0.0255) | 0.7275 (0.0395)      | 0.7452 (0.0062)            | 0.7516 (0.0170)               |
| F1 (SD)               | 0.7076 (0.0315) | 0.6806 (0.0410)      | 0.7219 (0.0146)            | 0.6724 (0.0404)               |
| Sensitivity (SD)      | 0.7393 (0.0570) | 0.6936 (0.0600)      | 0.7932 (0.0532)            | 0.6169 (0.0785)               |
| Specificity (SD)      | 0.7494 (0.0443) | 0.7522 (0.0737)      | 0.7108 (0.0360)            | 0.8487 (0.0429)               |
| Precision (SD)        | 0.6813 (0.0329) | 0.6740 (0.0632)      | 0.6647 (0.0145)            | 0.7516 (0.0442)               |
| <b>Test Set</b>       |                 |                      |                            |                               |
| <b>Method</b>         | <b>XGBoost</b>  | <b>Deep learning</b> | <b>Logistic regression</b> | <b>Support vector machine</b> |
| AUC                   | 0.8085          | 0.7730               | 0.8201                     | 0.8045                        |
| Accuracy              | 0.7488          | 0.7440               | 0.7488                     | 0.7295                        |
| F1                    | 0.7045          | 0.6748               | 0.7143                     | 0.6216                        |
| Sensitivity           | 0.7126          | 0.6322               | 0.7471                     | 0.5287                        |
| Specificity           | 0.7750          | 0.8250               | 0.7500                     | 0.8750                        |
| Precision             | 0.6966          | 0.7239               | 0.6842                     | 0.7541                        |

## Supplementary Figures

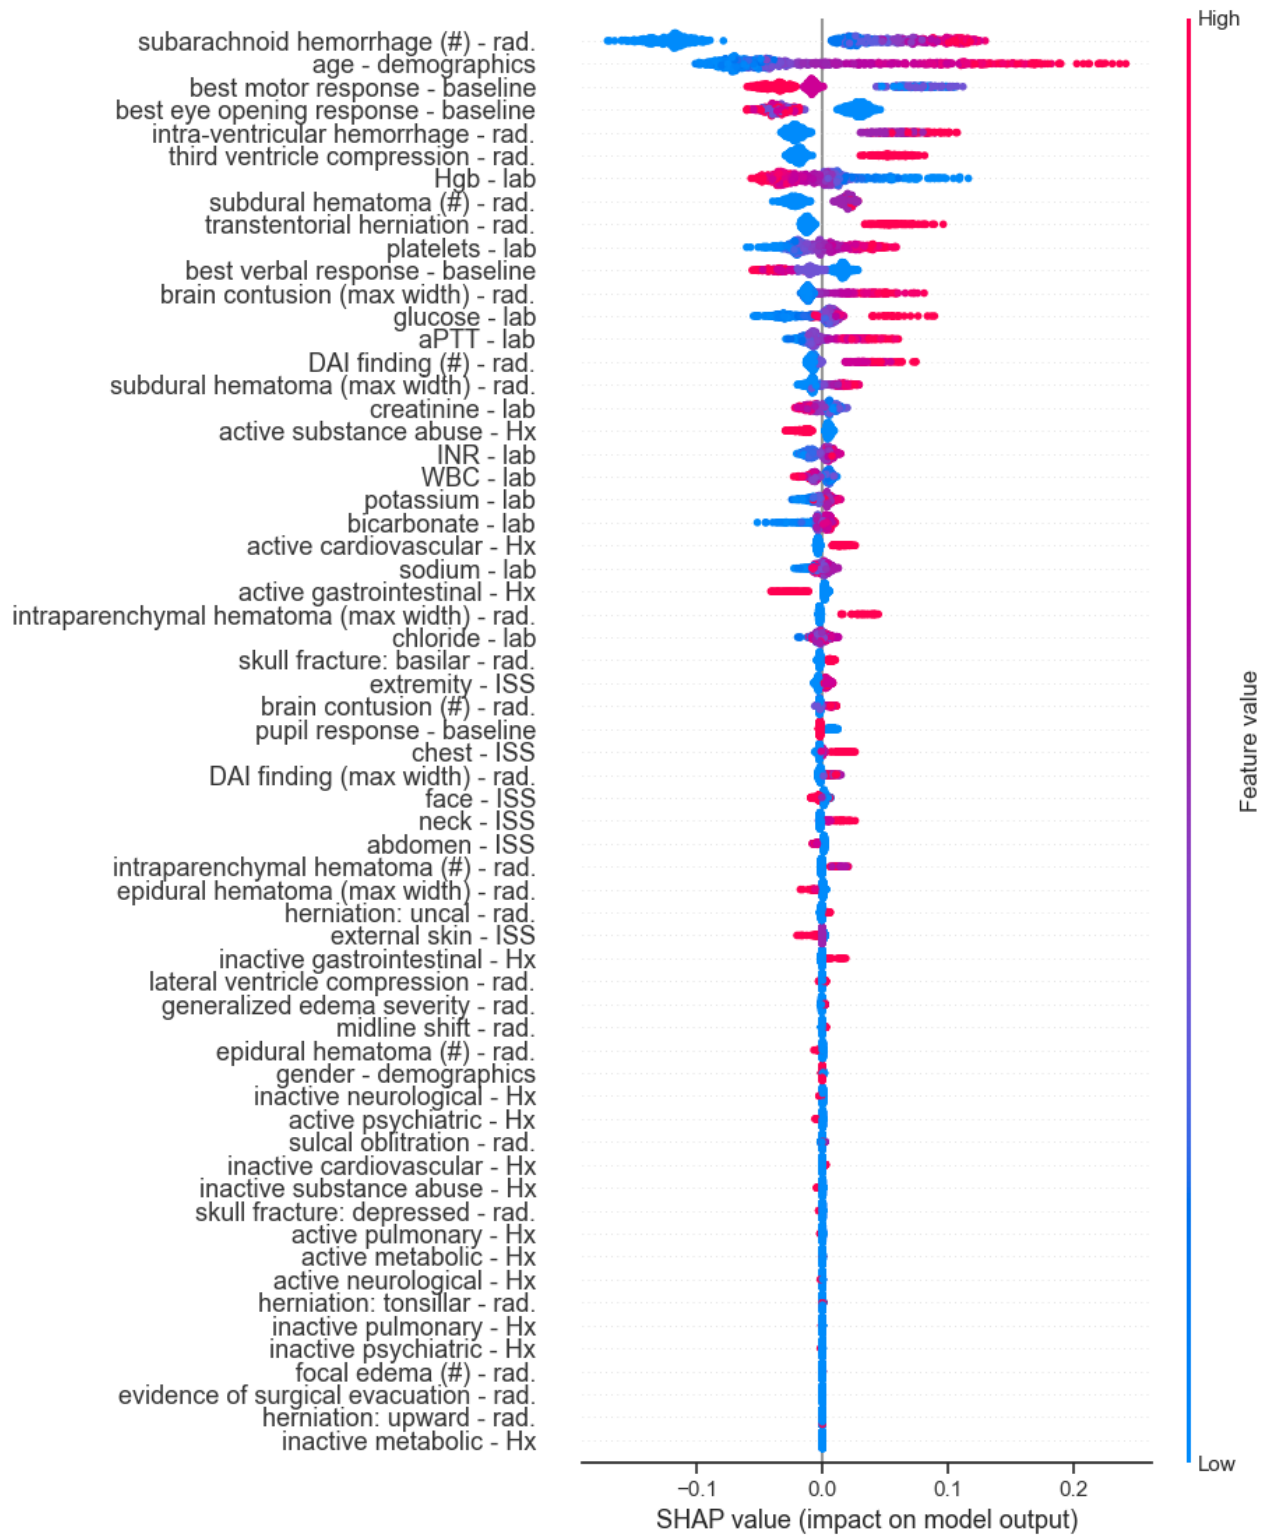

(a)

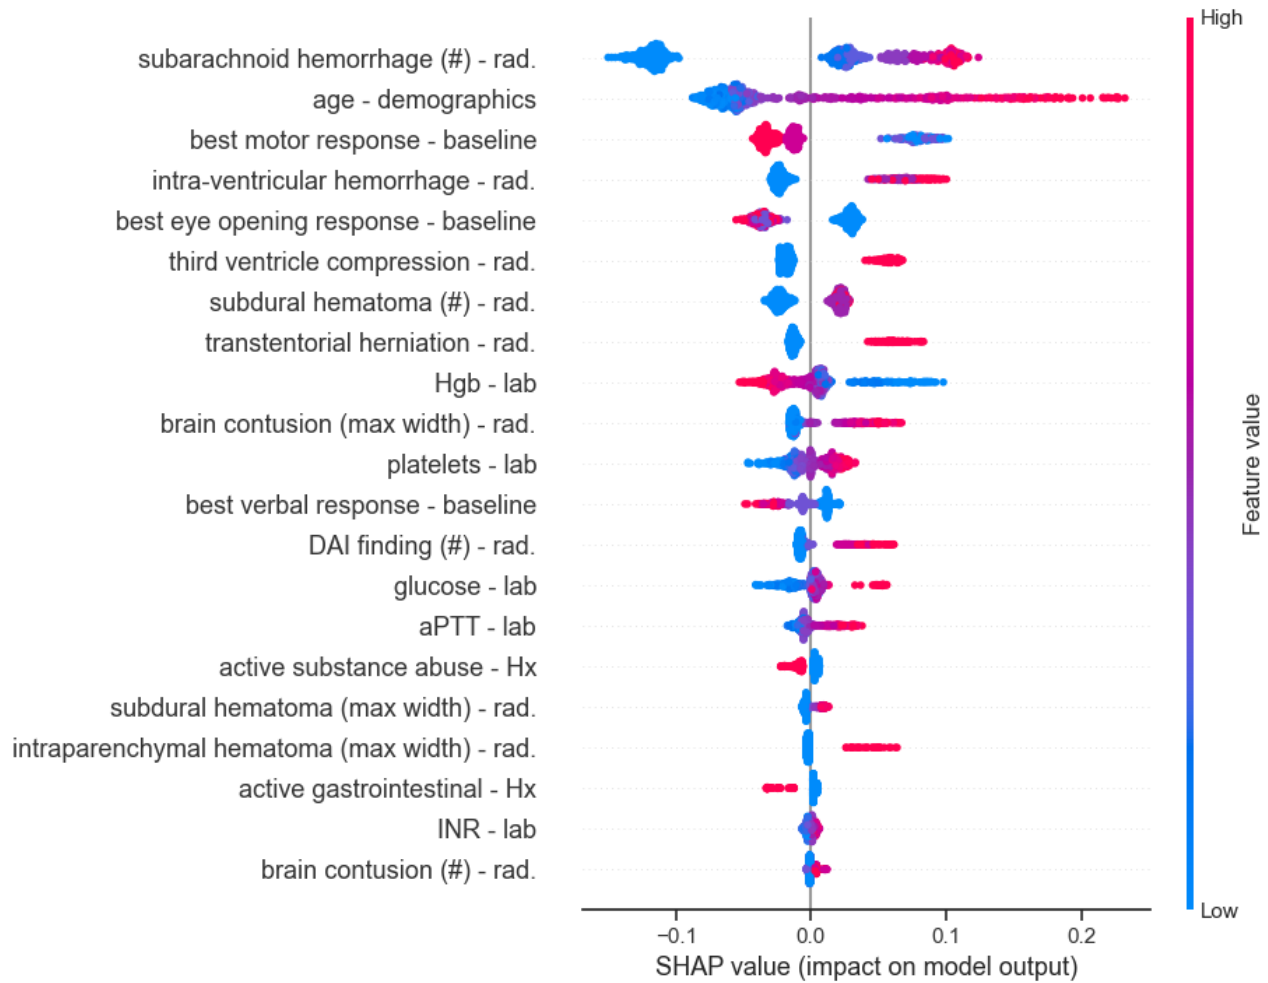

(b)

**Supplementary Figure 1.** Summary of SHAP contribution in the initial and intermediate model. (a) shows the summary of contributions in a model trained using the 62 candidate variables, (b) shows the summary of contributions in a model trained using the selected 21 robust variables. Variable types are denoted as follows - *rad*: radiology report, *lab*: laboratory value, *Hx*: medical history, and *ISS*: injury severity score.

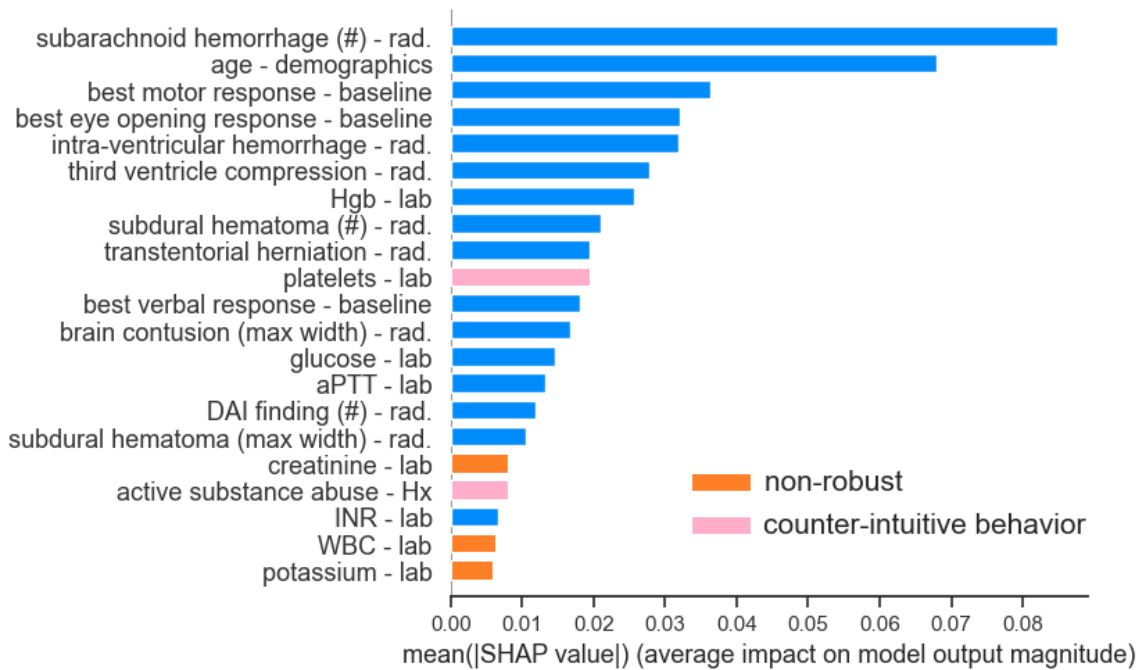

(a)

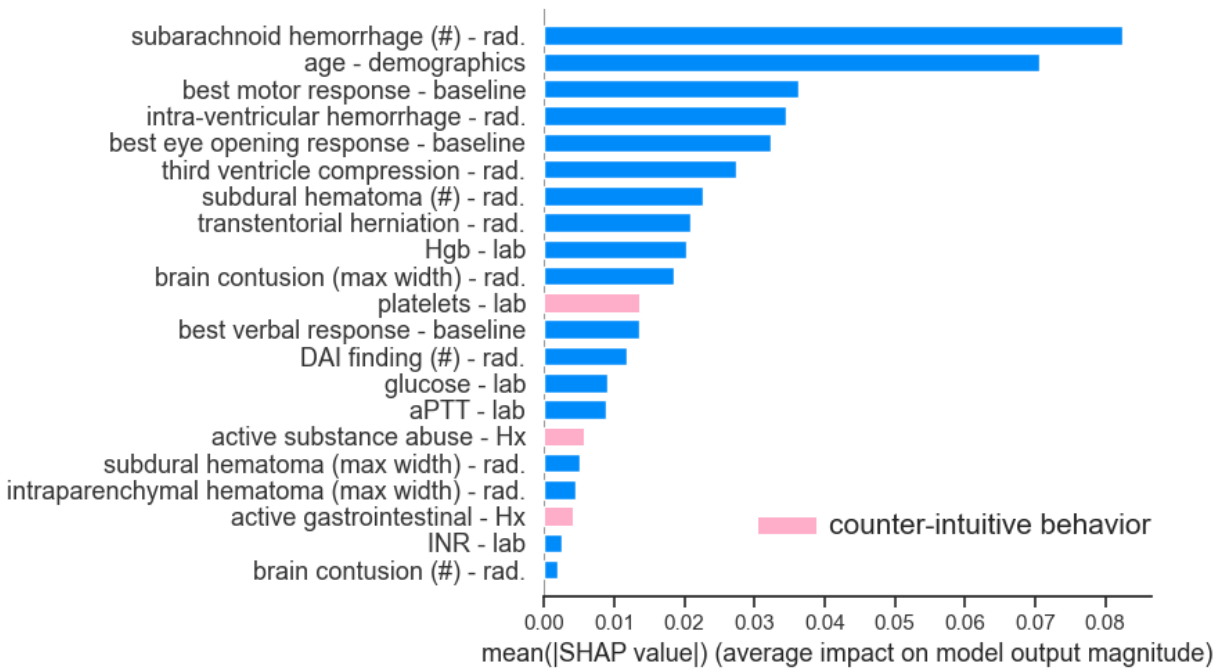

(b)

**Supplementary Figure 2.** Variables are shown in order of their average impact on the predicted risk, where impact is defined as the average absolute SHAP value. (a) corresponds to the initial model with 62 candidate features. Only 21 variables with the highest impact are shown in the plot. (b) corresponds to the model with 21 robust variables. Variable types are denoted as follows - *rad*: radiology report, *lab*: laboratory value, and *Hx*: medical history.

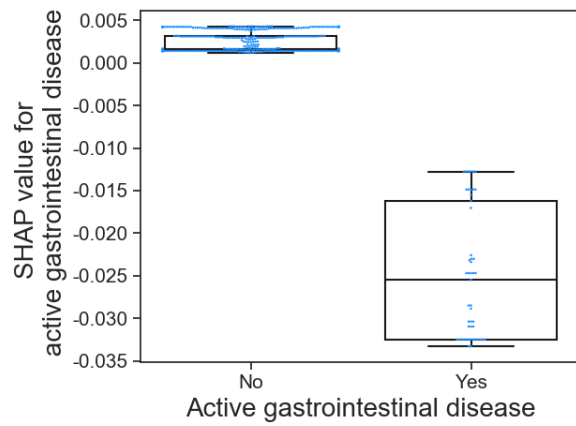

(a)

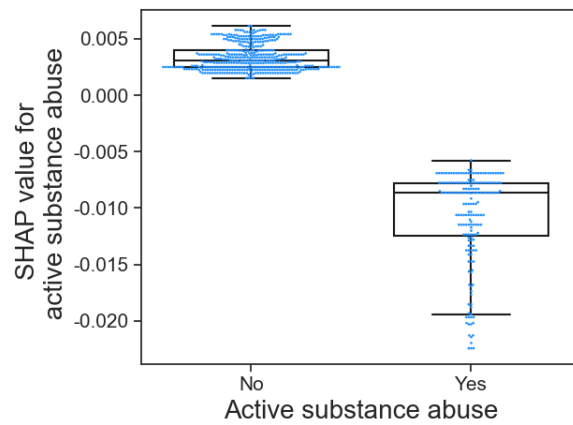

(b)

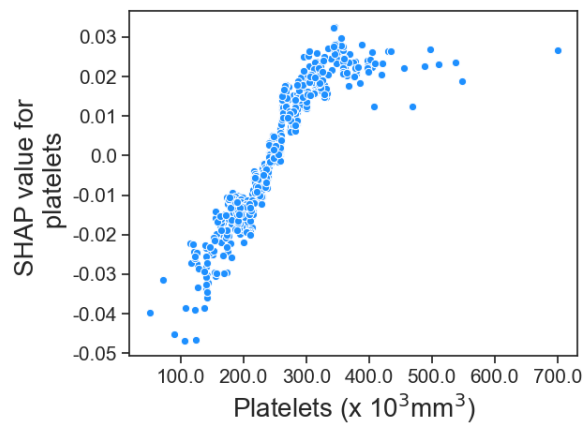

(c)

**Supplementary Figure 3.** SHAP contribution for variable with robust counterintuitive behavior. (a) shows the contribution of presence of active gastrointestinal disease contribution, (b) shows the contribution of active substance abuse, while (c) shows the contribution of platelet count.

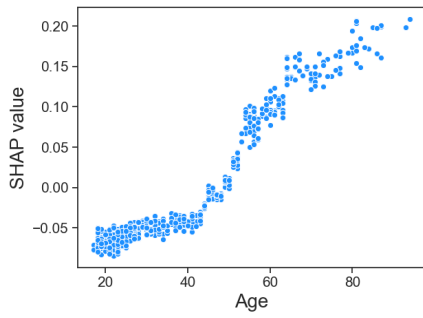

(a)

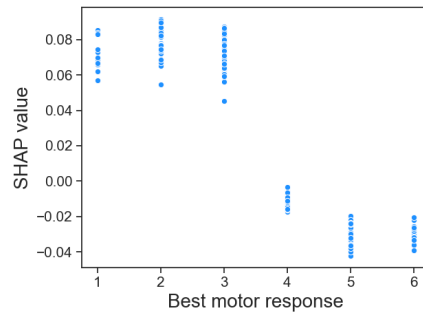

(b)

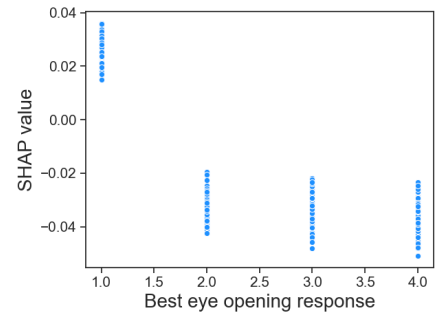

(c)

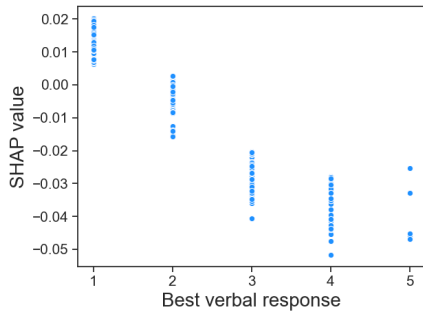

(d)

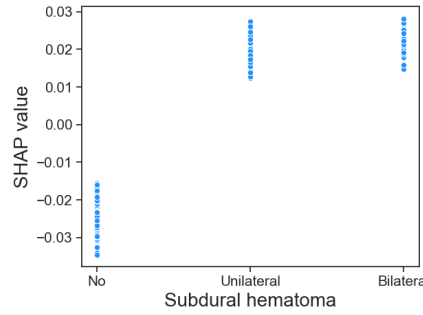

(e)

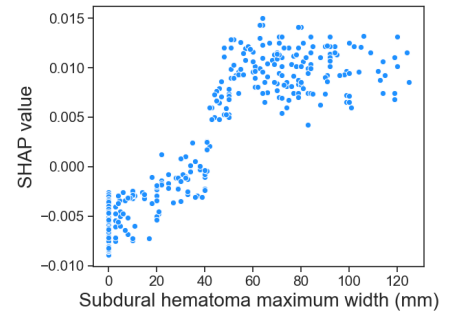

(f)

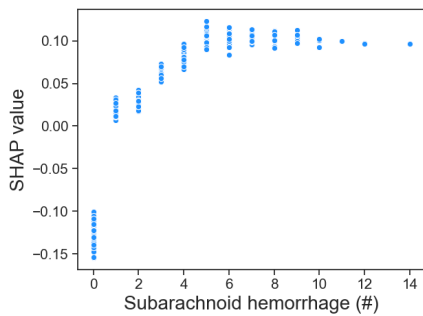

(g)

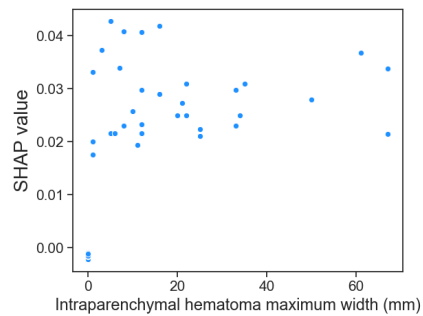

(h)

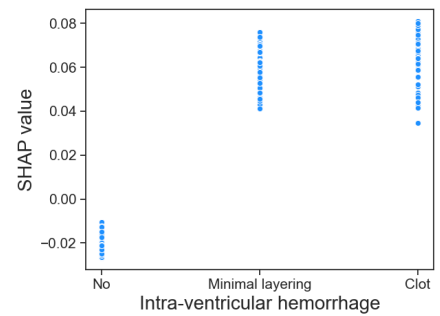

(i)

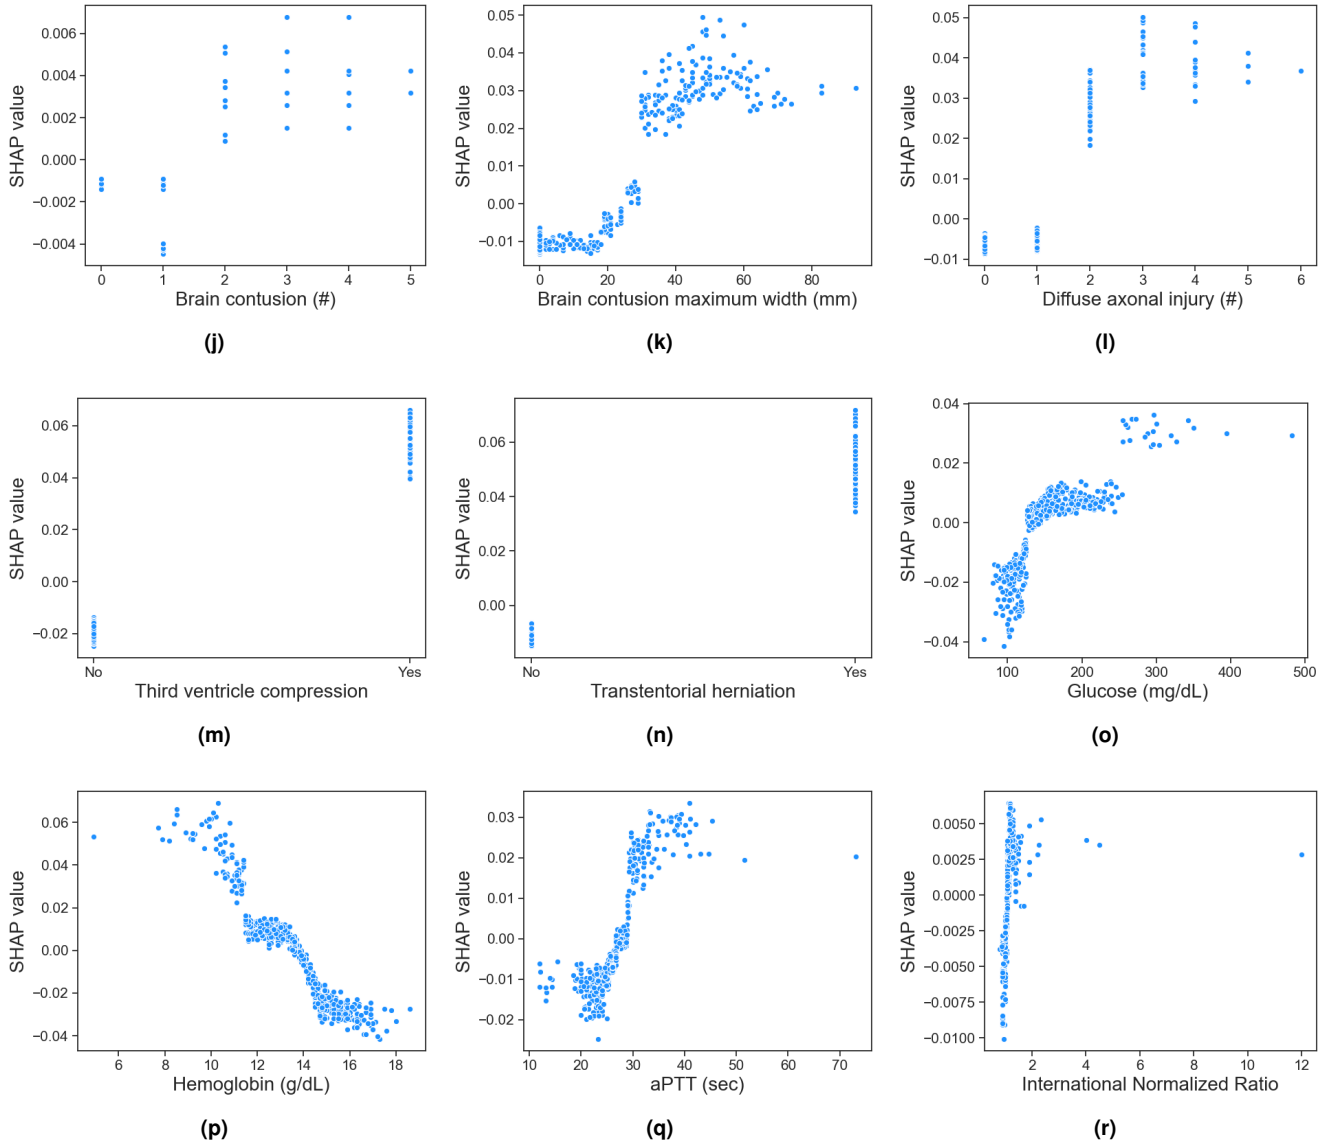

**Supplementary Figure 4.** Detailed contribution of the 18 selected features.

## References

1. Teasdale, G. & Jennett, B. Assessment and prognosis of coma after head injury. *Acta neurochirurgica* **34**, 45–55 (1976).
